# Supplementary material
Source: HighWire-hosted journal article supplement (https://thorax.bmj.com/content/78/5/459)

## **Supplementary material**

### **Short term exposure to ambient air pollution and individual emergency department visits for COVID-19: a case-crossover study in Canada**

**Table S1.** Daily interquartile ranges of ambient air pollutants across months of the study

| Month     | PM <sub>2.5</sub> (µg/m <sup>3</sup> ) | NO <sub>2</sub> (ppb) | O <sub>3</sub> (ppb) |
|-----------|----------------------------------------|-----------------------|----------------------|
| March     | 8.80                                   | 8.34                  | 9.19                 |
| April     | 5.80                                   | 9.88                  | 10.11                |
| May       | 5.16                                   | 7.22                  | 8.16                 |
| June      | 5.63                                   | 8.68                  | 7.43                 |
| July      | 7.20                                   | 8.92                  | 10.88                |
| August    | 6.00                                   | 8.12                  | 15.14                |
| September | 6.57                                   | 9.59                  | 12.62                |
| October   | 6.06                                   | 6.69                  | 12.44                |
| November  | 4.48                                   | 5.69                  | 8.94                 |
| December  | 7.26                                   | 6.78                  | 9.93                 |
| January   | 4.97                                   | 7.05                  | 10.15                |

**Table S2.** Descriptive statistics and Pearson’s correlation coefficients between different daily-changing variables.

| Variables                        | Variables         |                 |                |             |                   |                            |                               |                                  |
|----------------------------------|-------------------|-----------------|----------------|-------------|-------------------|----------------------------|-------------------------------|----------------------------------|
|                                  | PM <sub>2.5</sub> | NO <sub>2</sub> | O <sub>3</sub> | Temperature | Relative Humidity | Workplaces mobility change | Effective reproduction number | OxCGRT Government Response Index |
| PM <sub>2.5</sub>                | 1.00              |                 |                |             |                   |                            |                               |                                  |
| NO <sub>2</sub>                  | 0.87              | 1.00            |                |             |                   |                            |                               |                                  |
| O <sub>3</sub>                   | -0.11             | -0.32           | 1.00           |             |                   |                            |                               |                                  |
| Temperature                      | 0.26              | 0.18            | -0.07          | 1.00        |                   |                            |                               |                                  |
| Relative Humidity                | 0.14              | 0.04            | 0.09           | 0.09        | 1.00              |                            |                               |                                  |
| Workplaces mobility change       | -0.10             | -0.15           | -0.04          | 0.11        | 0.13              | 1.00                       |                               |                                  |
| Effective reproduction number    | 0.05              | 0.11            | 0.15           | -0.42       | 0.24              | 0.43                       | 1.00                          |                                  |
| OxCGRT Government Response Index | -0.04             | -0.06           | 0.02           | 0.00        | -0.16             | -0.71                      | -0.70                         | 1.00                             |

**Table S3.** Odds ratios<sup>1</sup> (ORs) and 95% CIs for associations between acute exposure to ambient air pollutants and emergency department visits for COVID-19. ORs reflect a 6.2 µg/m<sup>3</sup> change in PM<sub>2.5</sub>, a 7.7 ppb change in NO<sub>2</sub> and a 10.8 ppb change in O<sub>3</sub>.

| Lag period                                              | PM2.5                 | NO2                   | O3                    |
|---------------------------------------------------------|-----------------------|-----------------------|-----------------------|
| Lag 0                                                   | 1.002 (0.990 – 1.005) | 1.008 (1.004 – 1.012) | 0.999 (0.995 – 1.004) |
| Lag 1                                                   | 1.002 (1.001 – 1.003) | 1.006 (1.004 – 1.008) | 0.999 (0.995 – 1.004) |
| Lag 2                                                   | 1.002 (0.997 – 1.007) | 1.007 (1.003 – 1.012) | 0.999 (0.995 – 1.004) |
| Lag 3                                                   | 1.009 (1.006 – 1.012) | 1.014 (1.010 – 1.019) | 0.999 (0.995 – 1.004) |
| Cumulative 0 – 3                                        | 1.010 (1.004 – 1.015) | 1.021 (1.015 – 1.028) | 0.999 (0.995 – 1.004) |
| I <sup>2</sup> (P value for heterogeneity) <sup>2</sup> | 42.8% (<0.01)         | 46.2% (<0.01)         | 62.9% (<0.01)         |

<sup>1</sup>Models represent pooled health region-specific estimates derived using two-stage random effects meta-analysis and meta-regression. Models adjusted for daily mean ambient temperature, relative humidity, the effective reproduction number, the OxCGRT Government Response Index and population density and percentage of the population self-identified as Black as meta-predictors.

<sup>2</sup>The variance due to heterogeneity estimated by the I<sup>2</sup>-statistic.

**Table S4.** Second-stage random-effects meta-analysis and meta-regression models for the associations between PM<sub>2.5</sub> (per 6.2 µg/m<sup>3</sup>) and COVID-19 ED visits: multivariate Wald test on significance of each meta-predictor in explaining variation in overall associations, Cochran Q test for heterogeneity and  $I^2$  statistics for residual heterogeneity.

| Meta-predictors             | AIC  | Cochran Q | Q test (p value) | $I^2$ | Effect modification by meta-predictor (p value) |
|-----------------------------|------|-----------|------------------|-------|-------------------------------------------------|
| Base model                  | 31.5 | 113.6     | < 0.001          | 65.7% | -                                               |
| < Low Income Cut-off (%)    | 24.8 | 95.3      | < 0.001          | 60.1% | 0.89                                            |
| Population density          | 24.4 | 93.8      | < 0.001          | 59.5% | 0.77                                            |
| Black (%)                   | 28.3 | 109.8     | < 0.001          | 65.4% | 0.15                                            |
| Poor health (%)             | 28.3 | 112.9     | < 0.001          | 66.3% | 0.08                                            |
| Urban (%)                   | 27.1 | 113.5     | < 0.001          | 66.5% | 0.22                                            |
| Overweight or obese (%)     | 25.1 | 83.6      | < 0.001          | 54.6% | 0.85                                            |
| Long term PM <sub>2.5</sub> | 25.1 | 83.6      | < 0.001          | 54.6% | 0.85                                            |
| + Population density        | 43.3 | 36.5      | 0.003            | 42.8% | 0.16                                            |
| + Black (%)                 |      |           |                  |       | 0.05                                            |

Different meta-regression models are being presented: base model (i.e. only including pooled ORs) and models with different meta-predictors. Random-effects multivariate meta-regression models were used to test potential effect modification by between-city differences in meta-predictors. The outcome variables in the meta-regression models in this study were the pooled estimates and the explanatory variables (i.e. potential effect modifiers) were the continuous variables at the health region level. Effect modification was considered statistically significant if the effect modifier's p-value was less than 0.05.

**Table S5.** Ssecond-stage random-effects meta-analysis and meta-regression models for the associations between NO<sub>2</sub> (per 7.7 ppb) and COVID-19 ED visits: multivariate Wald test on significance of each meta-predictor in explaining variation in overall associations, Cochran Q test for heterogeneity and  $I^2$  statistics for residual heterogeneity.

| Meta-predictors             | AIC  | Cochran Q | Q test<br>(p value) | $I^2$ | Effect modification<br>by meta-predictor<br>(p value) |
|-----------------------------|------|-----------|---------------------|-------|-------------------------------------------------------|
| Base model                  | 29.4 | 169.6     | < 0.001             | 77.0% | -                                                     |
| < Low Income Cut-off (%)    | 35.3 | 116.0     | < 0.001             | 67.3% | 0.43                                                  |
| Population density          | 35.9 | 116.8     | < 0.001             | 67.5% | 0.45                                                  |
| Black (%)                   | 35.3 | 166.0     | < 0.001             | 77.1% | 0.51                                                  |
| Poor health (%)             | 34.7 | 169.0     | < 0.001             | 77.5% | 0.53                                                  |
| Urban (%)                   | 33.5 | 165.2     | < 0.001             | 77.0% | 0.35                                                  |
| Overweight or obese (%)     | 35.0 | 95.7      | < 0.001             | 60.3% | 0.55                                                  |
| Long term PM <sub>2.5</sub> | 34.7 | 169.0     | < 0.001             | 77.5% | 0.53                                                  |
| + Population density        | 40.0 | 68.7      | 0.001               | 46.2% | 0.08                                                  |
| + Black (%)                 |      |           |                     |       | 0.08                                                  |

Different meta-regression models are being presented: base model (i.e. only including pooled ORs) and models with different meta-predictors. Random-effects multivariate meta-regression models were used to test potential effect modification by between-city differences in meta-predictors. The outcome variables in the meta-regression models in this study were the pooled estimates and the explanatory variables (i.e. potential effect modifiers) were the continuous variables at the health region level. Effect modification was considered statistically significant if the effect modifier's p-value was less than 0.05.

**Table S6.** Ssecond-stage random-effects meta-analysis and meta-regression models for the associations between O<sub>3</sub> (per 10.8 ppb) and COVID-19 ED visits: multivariate Wald test on significance of each meta-predictor in explaining variation in overall associations, Cochran Q test for heterogeneity and  $I^2$  statistics for residual heterogeneity.

| Meta-predictors             | AIC   | Cochran Q | Q test<br>(p value) | $I^2$ | Effect modification<br>by meta-predictor<br>(p value) |
|-----------------------------|-------|-----------|---------------------|-------|-------------------------------------------------------|
| Base model                  | 100.7 | 115.4     | < 0.001             | 66.2% | -                                                     |
| < Low Income Cut-off (%)    | 92.9  | 111.1     | < 0.001             | 65.8% | 0.93                                                  |
| Population density          | 92.8  | 110.7     | < 0.001             | 65.7% | 0.68                                                  |
| Black (%)                   | 93.0  | 100.0     | < 0.001             | 62.0% | 0.98                                                  |
| Poor health (%)             | 92.0  | 113.7     | < 0.001             | 66.6% | 0.22                                                  |
| Urban (%)                   | 95.6  | 114.0     | < 0.001             | 66.9% | 0.16                                                  |
| Overweight or obese (%)     | 93.3  | 107.7     | < 0.001             | 64.7% | 0.82                                                  |
| Long term PM <sub>2.5</sub> | 95.6  | 114.0     | < 0.001             | 66.9% | 0.16                                                  |
| + Population density        | 85.2  | 100.0     | < 0.001             | 62.9% | 0.62                                                  |
| + Black (%)                 |       |           |                     |       | 0.75                                                  |

Different meta-regression models are being presented: base model (i.e. only including pooled ORs) and models with different meta-predictors. Random-effects multivariate meta-regression models were used to test potential effect modification by between-city differences in meta-predictors. The outcome variables in the meta-regression models in this study were the pooled estimates and the explanatory variables (i.e. potential effect modifiers) were the continuous variables at the health region level. Effect modification was considered statistically significant if the effect modifier's p-value was less than 0.05.

**Table S7.** Odds ratios<sup>1</sup> (ORs) and 95% CIs for associations between the cumulative effects of ambient air pollutants over 0 to 3 days (per interquartile range increase) and emergency department visits for COVID-19, stratified by whether patients came from institutional settings and by time period of the study. ORs reflect a 6.2 µg/m<sup>3</sup> change in PM<sub>2.5</sub>, a 7.7 ppb change in NO<sub>2</sub> and a 10.8 ppb change in O<sub>3</sub>. Models represent pooled health region-specific estimates derived using two-stage random effects meta-analysis and meta-regression.

| Characteristics                                         | PM <sub>2.5</sub>                                      | NO <sub>2</sub>                                        | O <sub>3</sub>                                          |
|---------------------------------------------------------|--------------------------------------------------------|--------------------------------------------------------|---------------------------------------------------------|
| Institutional setting                                   |                                                        |                                                        |                                                         |
| Yes                                                     | 1.012 (0.992 – 1.033)<br>I <sup>2</sup> = 8.7% (0.34)  | 1.009 (0.989 – 1.029)<br>I <sup>2</sup> = 0.0% (0.48)  | 1.008 (0.994 – 1.023)<br>I <sup>2</sup> = 41.1% (0.02)  |
| No                                                      | 1.014 (1.007 – 1.020)<br>I <sup>2</sup> = 40.4% (0.02) | 1.027 (1.019 – 1.035)<br>I <sup>2</sup> = 30.7% (0.08) | 1.000 (0.995 – 1.005)<br>I <sup>2</sup> = 63.1% (<0.01) |
| P value for effect modification                         | 0.58                                                   | 0.84                                                   | 0.95                                                    |
| I <sup>2</sup> (P value for heterogeneity) <sup>2</sup> | I <sup>2</sup> = 29.1% (0.03)                          | I <sup>2</sup> = 23.5% (0.07)                          | I <sup>2</sup> = 53.5% (<0.01)                          |
| Time period                                             |                                                        |                                                        |                                                         |
| March 2020 to September 2020                            | 1.024 (1.017 – 1.030)<br>I <sup>2</sup> = 0.0% (0.68)  | 1.001 (0.978 – 1.023)<br>I <sup>2</sup> = 18.3% (0.20) | 1.035 (1.024 – 1.046)<br>I <sup>2</sup> = 57.3% (<0.01) |
| October 2020 to March 2021                              | 1.018 (1.013 – 1.023)<br>I <sup>2</sup> = 24.2% (0.13) | 1.034 (1.026 – 1.042)<br>I <sup>2</sup> = 33.3% (0.05) | 0.994 (0.988 – 1.000)<br>I <sup>2</sup> = 0.0% (0.50)   |
| P value for effect modification                         | 0.55                                                   | 0.03                                                   | (<0.01)                                                 |
| I <sup>2</sup> (P value for heterogeneity) <sup>2</sup> | I <sup>2</sup> = 5.2% (0.37)                           | I <sup>2</sup> = 43.6% (<0.01)                         | I <sup>2</sup> = 71.3% (<0.01)                          |

<sup>1</sup> Models represent pooled health region-specific estimates derived using two-stage random effects meta-analysis and meta-regression. ORs reflect a 6.2 µg/m<sup>3</sup> change in PM<sub>2.5</sub>, a 7.7 ppb change in NO<sub>2</sub> and a 10.8 ppb change in O<sub>3</sub>. Models adjusted for daily mean ambient temperature, relative humidity, the effective reproduction number, the OxCGR Government Response Index and population density and percentage of the population self-identified as Black as meta-predictors.

I<sup>2</sup>: The variance due to heterogeneity estimated by the I<sup>2</sup>-statistic for the strata models and the models when calculating the p value for effect modification. In parentheses, the p values for the statistical significance of heterogeneity are reported.



**Table S8.** Odds ratios<sup>1</sup> (ORs) and 95% CIs for associations between acute exposure to ambient air pollutants and emergency department visits for myocardial infarction. ORs reflect a 1.8 µg/m<sup>3</sup> change in PM<sub>2.5</sub>, a 2.3 ppb change in NO<sub>2</sub> and a 11.7 ppb change in O<sub>3</sub> (N = 26,437). The interquartile ranges were based on cases of MI during the time period of March 1<sup>st</sup> 2020 and March 31<sup>st</sup> 2021, in Alberta and Ontario.

| Lag period                                              | PM2.5                 | NO2                   | O3                    |
|---------------------------------------------------------|-----------------------|-----------------------|-----------------------|
| Lag 0                                                   | 1.004 (0.984 – 1.025) | 1.007 (0.979 – 1.035) | 0.970 (0.915 – 1.028) |
| Lag 1                                                   | 1.007 (0.987 – 1.028) | 1.001 (0.974 – 1.029) | 0.991 (0.936 – 1.049) |
| Lag 2                                                   | 1.014 (0.993 – 1.035) | 0.995 (0.959 – 1.033) | 0.996 (0.929 – 1.068) |
| Lag 3                                                   | 0.999 (0.978 – 1.020) | 0.988 (0.953 – 1.024) | 0.985 (0.915 – 1.060) |
| Cumulative 0 – 3                                        | 1.003 (1.001 – 1.006) | 0.998 (0.995 – 1.000) | 0.998 (0.997 – 0.998) |
| I <sup>2</sup> (P value for heterogeneity) <sup>2</sup> | 2.5% (0.95)           | 0.0% (0.99)           | 0.0% (0.98)           |

<sup>1</sup>Models represent pooled health region-specific estimates derived using two-stage random effects meta-analysis and meta-regression. Models adjusted for daily mean ambient temperature, relative humidity and the OxCGRT Government Response Index

<sup>2</sup>The variance due to heterogeneity estimated by the I<sup>2</sup>-statistic.

**Figure S1.** Odds ratios<sup>1</sup> (ORs) and 95% CIs for associations between PM<sub>2.5</sub> (per 6.2 µg/m<sup>3</sup>) and emergency department visits for COVID-19 for lags 0 to 21 days. Models represent pooled health region-specific estimates derived using two-stage random effects meta-analysis and meta-regression. Models adjusted for daily mean ambient temperature, relative humidity, the effective reproduction number, the OxCGR Government Response Index and population density and percentage of the population self-identified as Black as meta-predictors.

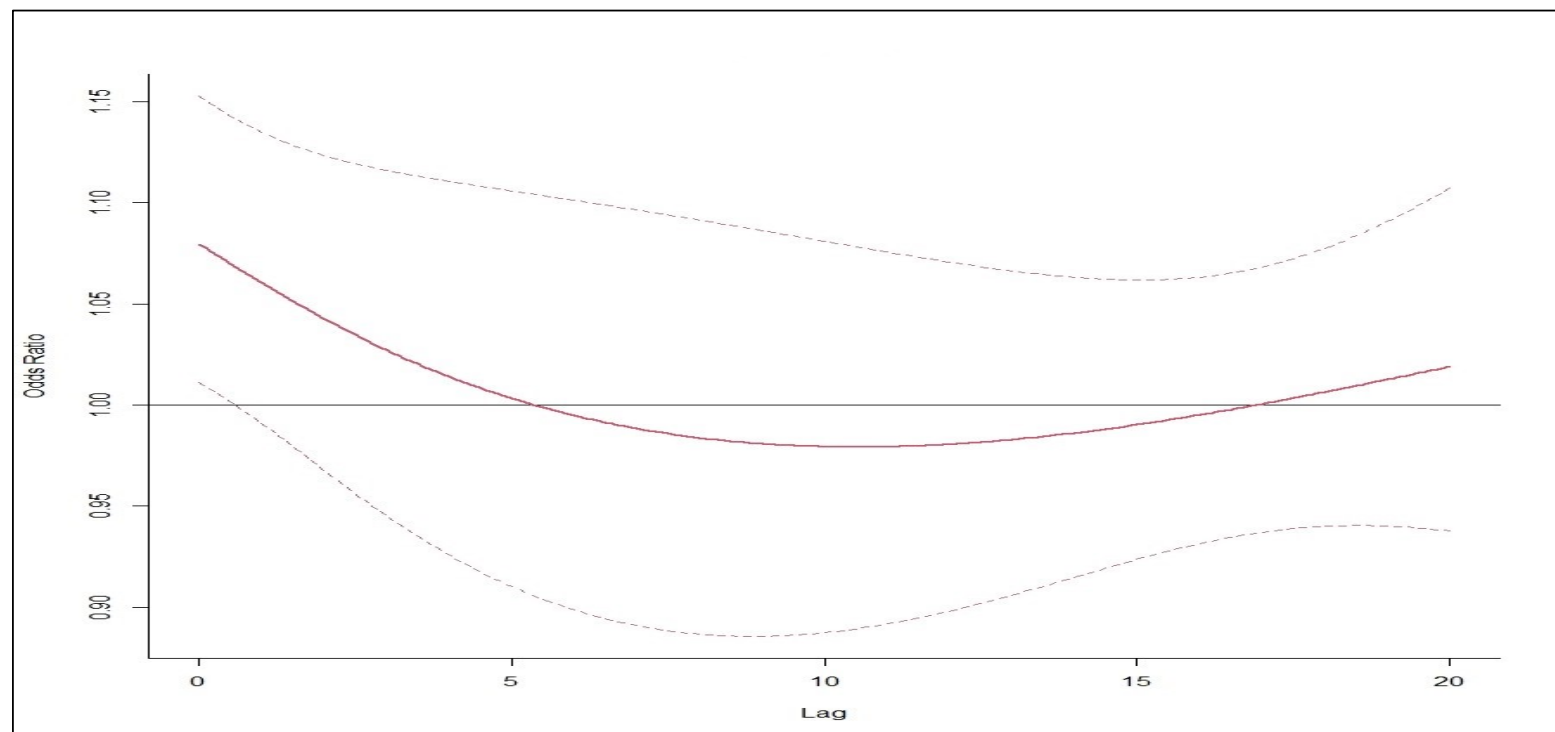

**Figure S2.** Directed acyclic graph for estimating the direct effect of ambient air pollution exposure on COVID-19 ED visits. **Parameters in red are potential confounding factors.** Green line: causal path. According to the DAG, the minimal sufficient adjustment for estimating the total effect of ambient air pollution on COVID-19 ED visits is: ambient temperature, Government Stringency Index, Relative humidity, Rt

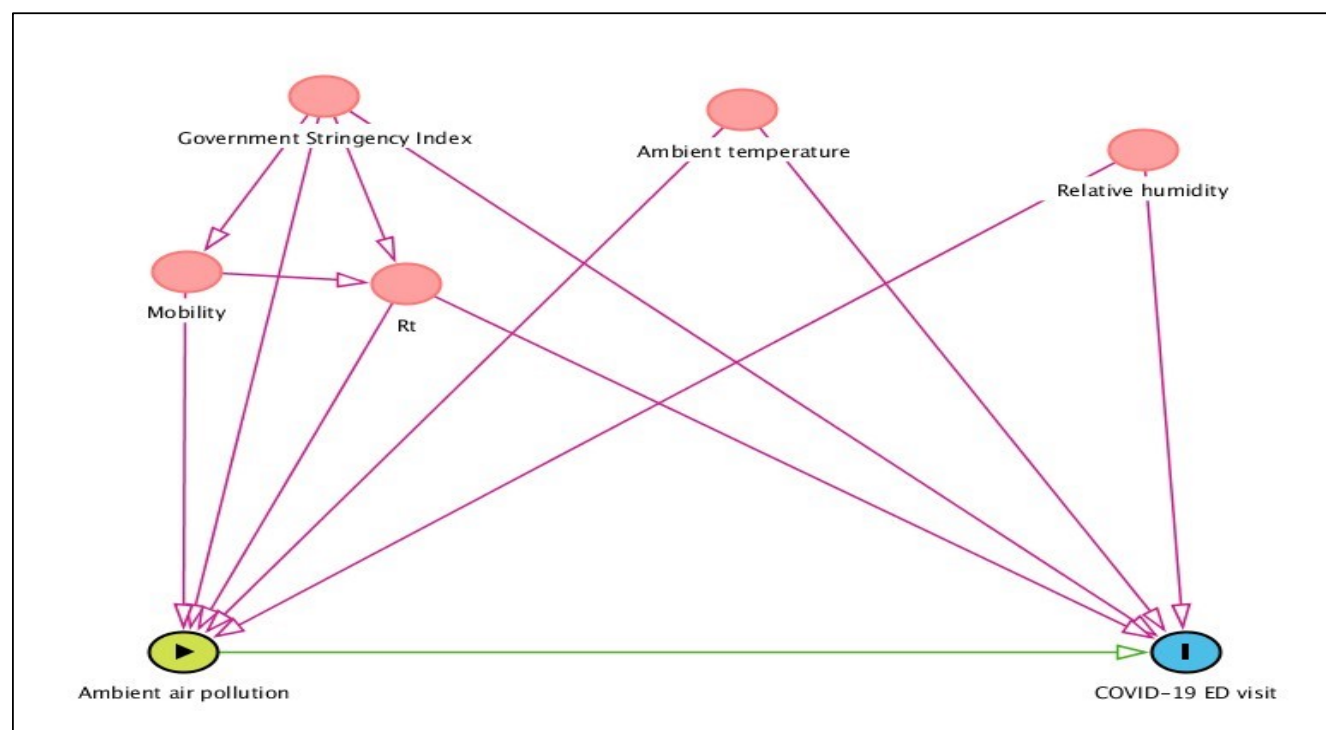

Supplement: inline-supplementary-material-1 [file inline-supplementary-material-1.pdf]
